# Supplementary material for: Cryptic roles of tetrathionate in the sulfur cycle of marine sediments: microbial drivers and indicators
Source: Copernicus journal article supplement (doi:10.5194/bg-17-4611-2020), 2020-09-22
Supplement: Supplementary file 1 [file bg-17-4611-2020-supplement.zip]

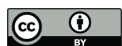

## *Supplement of*

# **Cryptic roles of tetrathionate in the sulfur cycle of marine sediments: microbial drivers and indicators**

**Subhrangshu Mandal et al.**

*Correspondence to:* Wriddhiman Ghosh ([wriman@jcbose.ac.in](mailto:wriman@jcbose.ac.in)) and Aninda Mazumdar ([maninda@nio.org](mailto:maninda@nio.org))

- [bg-17-4611-2020-supplement-title-page.pdf](#)
- [1\\_Supplementary Information.doc](#)
- [2\\_Supplementary Dataset.xlsx](#)

The copyright of individual parts of the supplement might differ from the CC BY 4.0 License.
